# Supplementary material for: Identification and validation of ubiquitin-proteasome system related genes as a prognostic signature for papillary renal cell carcinoma
Source: publisher site journal article supplement (doi:10.18632/aging.204383), 2022-11-16
Supplement: Supplementary file [file aging-v14i23-204383-supplementary-material-SD1.pdf]

**SUPPLEMENTARY FIGURES**

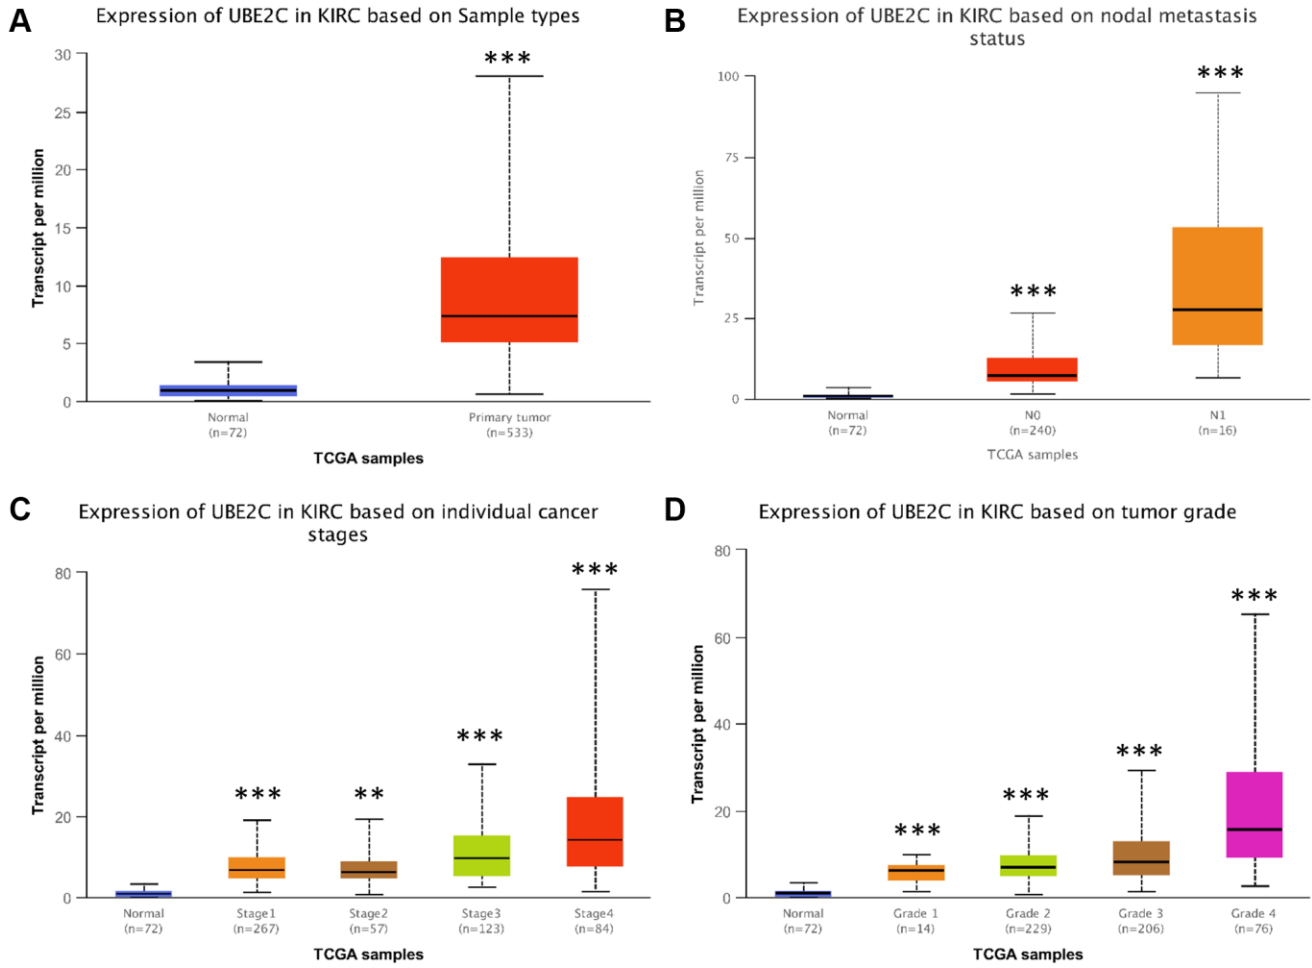

**Supplementary Figure 1. Association of UBE2C mRNA expression with clinicopathologic characteristics. (A) sample types. (B) nodal metastasis status. (C) individual cancer stages. (D) tumor grade.**

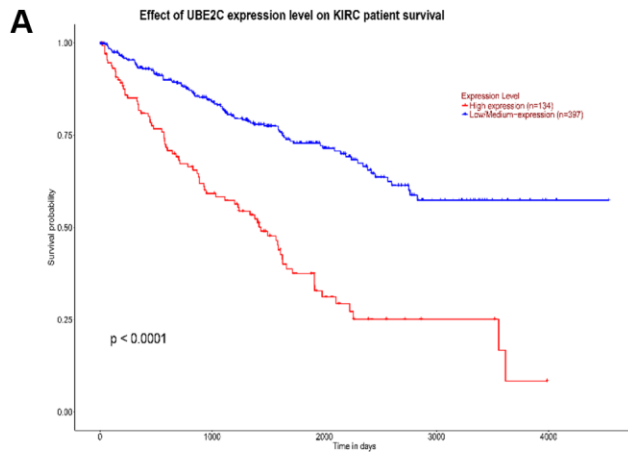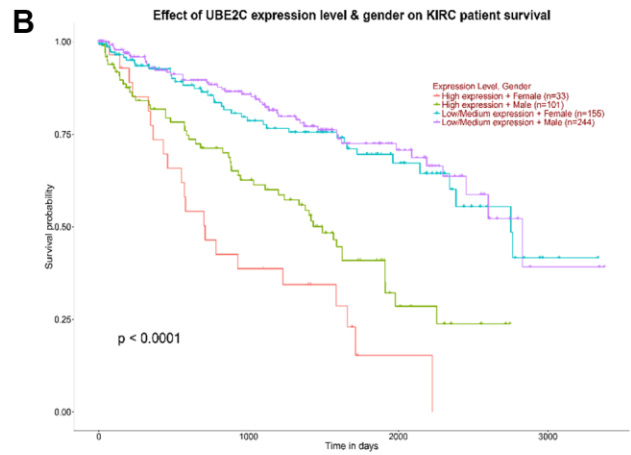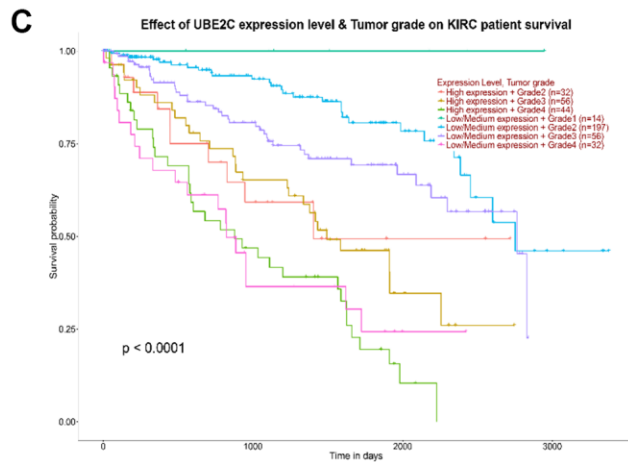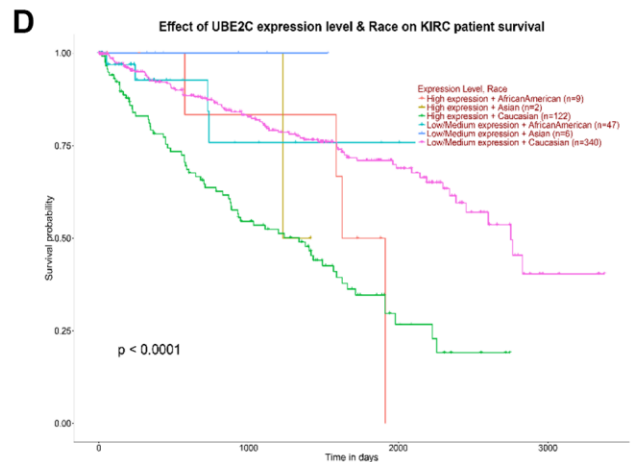

**Supplementary Figure 2. The prognostic value of mRNA levels of UBE2C factor and subclinical factors in ccRCC patients. (A)** The overall survival of UBE2C in PRCC for all cases ( $P < 0.0001$ ). **(B)** The overall survival of UBE2C and gender in PRCC ( $P < 0.0001$ ). **(C)** The overall survival of UBE2C and tumor grade in PRCC ( $P < 0.0001$ ). **(D)** The overall survival of UBE2C and race in PRCC ( $P < 0.0001$ ).

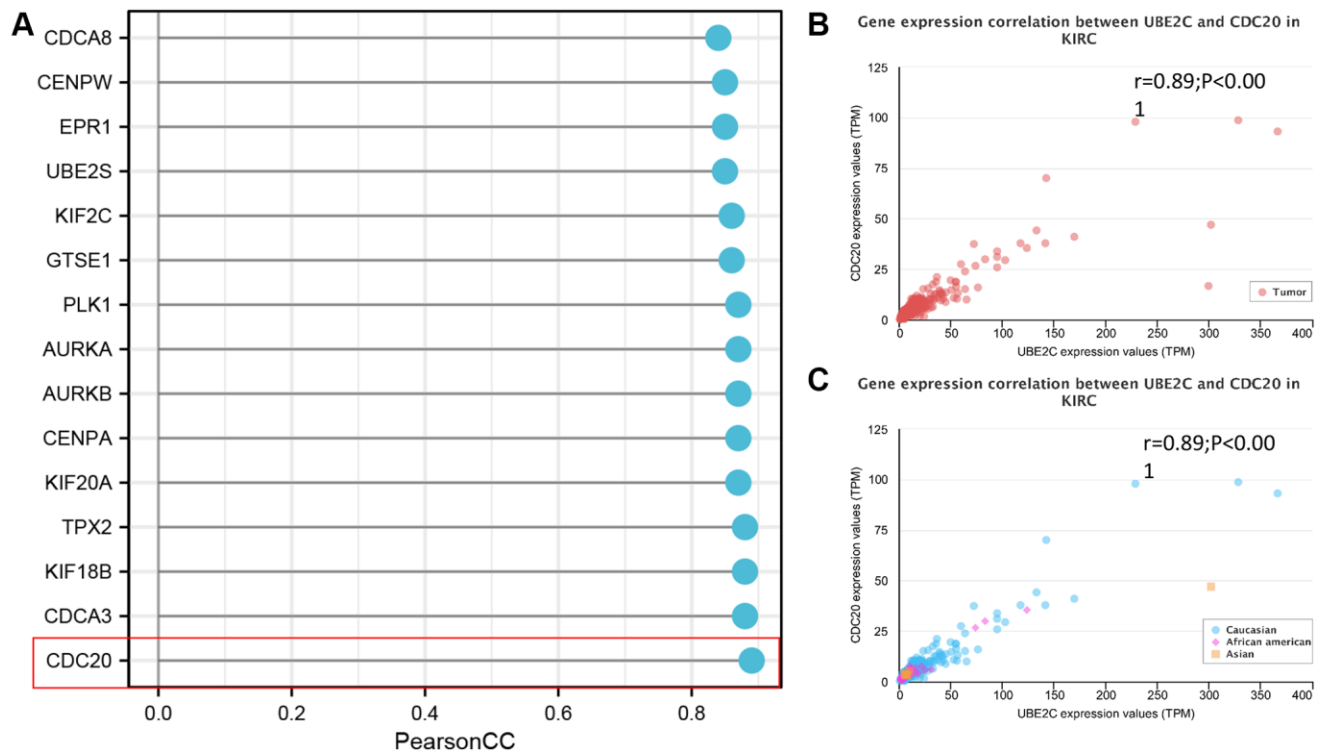

**Supplementary Figure 3. The relationship of UBE2C with checkpoint inhibitors in PRCC.** (A) The Pearson correlation of UBE2C with 47 different checkpoint inhibitors and 15 of them was displayed. (B and C) The coefficient and *p*-value of UBE2C and CDC20 were shown on the graph.
